# Supplementary material for: Structural diversification and metal-directed assembly of coordination architectures based on tetrabromoterephthalic acid and a bent dipyridyl tecton 2,5-bis(4-pyridyl)-1,3,4-oxadiazole
Source: Royal Society of Chemistry journal article supplement (doi:10.1039/c003738a), 2010-01-01
Supplement: c003738a.pdf [file c003738a.pdf]

*Electronic Supplementary Information (ESI)*

**Structural diversification and metal-directed assembly of coordination architectures based on tetrabromoterephthalic acid and a bent dipyridyl tecton 2,5-bis(4-pyridyl)-1,3,4-oxadiazole**

Cheng-Peng Li, Jing Chen and Miao Du\*

*College of Chemistry and Life Science, Tianjin Key Laboratory of Structure and Performance for Functional Molecule, Tianjin Normal University, Tianjin 300387, P. R. China*

\* To whom correspondence should be addressed. E-mail: dumiao@public.tpt.tj.cn.

***CrystEngComm***

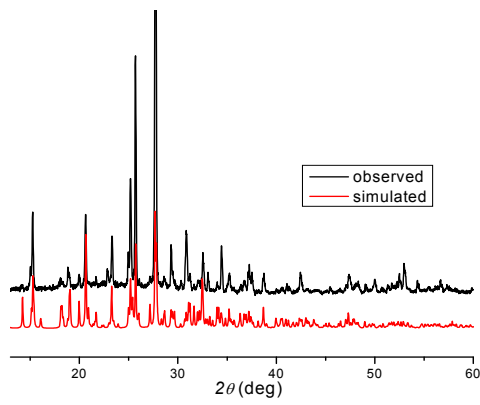

(a)

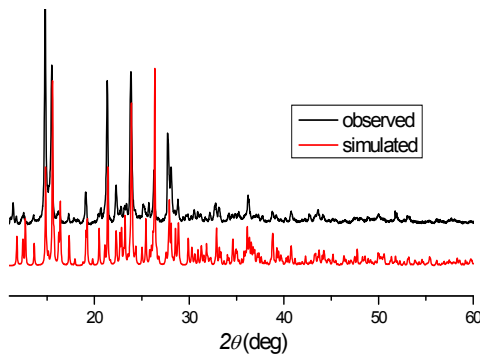

(b)

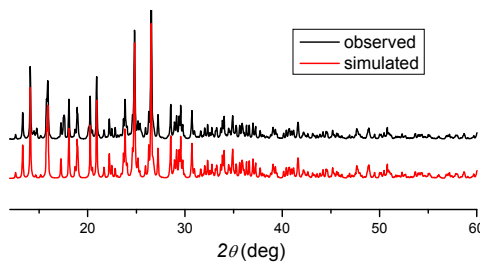

(c)

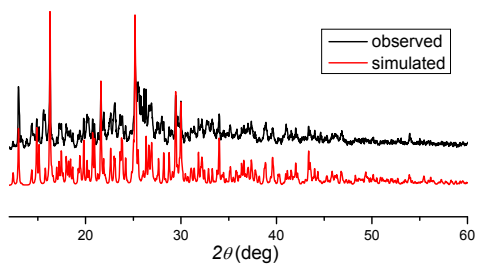

(d)

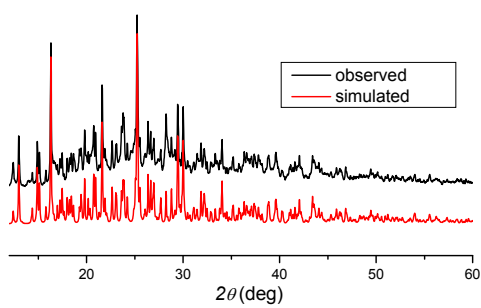

(e)

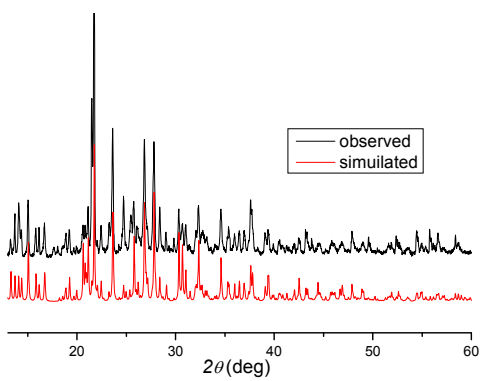

(f)

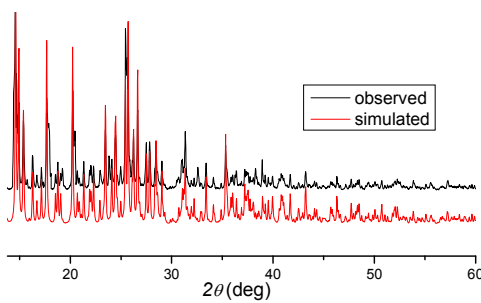

(g)

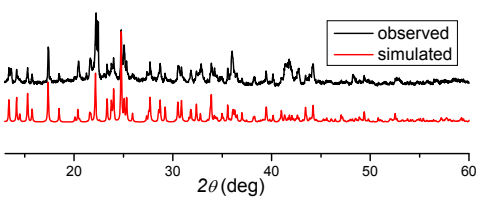

(h)

**Fig. S1** Powder X-ray diffraction (PXRD) patterns for complexes **1–8 (a–h)**.

**Table S1** Selective bond lengths (Å) and angles (°) for complexes **1–8**

---

| <b>1</b>  |            |           |            |
|-----------|------------|-----------|------------|
| Co1–N5    | 2.096(4)   | Co1–O1    | 2.134(3)   |
| Co1–N1    | 2.181(4)   |           |            |
| N5–Co1–O1 | 89.09(13)  | N5–Co1–N1 | 89.41(16)  |
| O1–Co1–N1 | 88.47(13)  |           |            |
| <b>2</b>  |            |           |            |
| Ni1–O2    | 2.050(2)   | Ni1–O4    | 2.066(2)   |
| Ni1–N1    | 2.104(3)   |           |            |
| O2–Ni1–O4 | 88.05(10)  | O2–Ni1–N1 | 91.64(10)  |
| O4–Ni1–N1 | 88.17(11)  |           |            |
| <b>3</b>  |            |           |            |
| Zn1–O4    | 2.1027(17) | Zn1–O2    | 2.1157(16) |
| Zn1–N1    | 2.167(2)   |           |            |
| O4–Zn1–O2 | 91.30(7)   | O4–Zn1–N1 | 92.32(7)   |
| O2–Zn1–N1 | 92.62(7)   |           |            |
| <b>4</b>  |            |           |            |
| Ag1–O7    | 2.290(4)   | Ag1–O5    | 2.312(4)   |
| Ag1–N5    | 2.337(6)   | Ag1–N1    | 2.340(6)   |
| Ag1–O3    | 2.391(5)   | Ag1–O4    | 2.468(5)   |
| Ag1–O6    | 2.736(5)   |           |            |
| O7–Ag1–O5 | 134.29(17) | O7–Ag1–N5 | 85.0(2)    |
| O5–Ag1–N5 | 90.80(19)  | O7–Ag1–N1 | 82.02(19)  |

|           |            |           |            |
|-----------|------------|-----------|------------|
| O5–Ag1–N1 | 92.81(18)  | N5–Ag1–N1 | 164.87(19) |
| O7–Ag1–O3 | 140.58(17) | O5–Ag1–O3 | 84.98(16)  |
| N5–Ag1–O3 | 92.45(19)  | N1–Ag1–O3 | 102.50(19) |
| O7–Ag1–O4 | 86.83(17)  | O5–Ag1–O4 | 138.60(16) |
| N5–Ag1–O4 | 88.16(19)  | N1–Ag1–O4 | 98.72(18)  |
| O3–Ag1–O4 | 53.76(16)  | O5–Ag1–O6 | 51.20(16)  |
| O3–Ag1–O6 | 135.95(14) | O4–Ag1–O6 | 170.19(15) |
| N1–Ag1–O6 | 78.54(17)  | N5–Ag1–O6 | 92.41(17)  |
| O7–Ag1–O6 | 83.46(17)  |           |            |

## 5

|           |            |           |            |
|-----------|------------|-----------|------------|
| Cd1–O7    | 2.286(3)   | Cd1–O5    | 2.314(3)   |
| Cd1–N1    | 2.335(3)   | Cd1–N5    | 2.339(3)   |
| Cd1–O3    | 2.390(3)   | Cd1–O4    | 2.467(3)   |
| Cd1–O6    | 2.737(3)   |           |            |
| O7–Cd1–O5 | 134.03(11) | O7–Cd1–N1 | 81.95(12)  |
| O5–Cd1–N1 | 92.76(11)  | O7–Cd1–N5 | 84.63(13)  |
| O5–Cd1–N5 | 91.06(12)  | N1–Cd1–N5 | 164.54(13) |
| O7–Cd1–O3 | 140.81(11) | O5–Cd1–O3 | 85.01(11)  |
| N1–Cd1–O3 | 102.62(12) | N5–Cd1–O3 | 92.62(12)  |
| O7–Cd1–O4 | 87.09(11)  | O5–Cd1–O4 | 138.62(11) |
| N1–Cd1–O4 | 98.69(11)  | N5–Cd1–O4 | 88.22(11)  |
| O3–Cd1–O4 | 53.72(11)  | O5–Cd1–O6 | 51.14(11)  |
| O3–Cd1–O6 | 135.96(10) | O4–Cd1–O6 | 170.21(10) |
| N1–Cd1–O6 | 78.48(12)  | N5–Cd1–O6 | 92.39(10)  |
| O7–Cd1–O6 | 83.23(11)  |           |            |

## 6

|         |          |        |          |
|---------|----------|--------|----------|
| Cu1–O5A | 1.977(2) | Cu1–O2 | 1.983(2) |
| Cu1–N4B | 2.009(3) | Cu1–N1 | 2.010(3) |

|            |            |             |            |
|------------|------------|-------------|------------|
| Cu1–O6     | 2.190(3)   |             |            |
| O5A–Cu1–O2 | 179.18(10) | O5A–Cu1–N4B | 92.87(10)  |
| O2–Cu1–N4B | 87.25(10)  | O5A–Cu1–N1  | 90.45(10)  |
| O2–Cu1–N1  | 89.14(10)  | N4B–Cu1–N1  | 157.90(11) |
| O5A–Cu1–O6 | 86.98(10)  | O2–Cu1–O6   | 93.81(9)   |
| N4B–Cu1–O6 | 96.73(11)  | N1–Cu1–O6   | 105.26(11) |

7

|             |           |            |            |
|-------------|-----------|------------|------------|
| Zn1–O6      | 1.992(5)  | Zn1–O2     | 2.037(4)   |
| Zn1–N4B     | 2.044(5)  | Zn1–N1     | 2.046(5)   |
| Zn1–O4A     | 2.167(4)  |            |            |
| O6–Zn1–O2   | 86.53(19) | O6–Zn1–N4B | 116.2(2)   |
| O2–Zn1–N4B  | 98.9(2)   | O6–Zn1–N1  | 114.7(3)   |
| O2–Zn1–N1   | 97.17(19) | N4B–Zn1–N1 | 127.2(2)   |
| O6–Zn1–O4A  | 87.52(18) | O2–Zn1–O4A | 173.77(18) |
| N4B–Zn1–O4A | 85.41(19) | N1–Zn1–O4A | 83.64(19)  |

8

|            |          |             |         |
|------------|----------|-------------|---------|
| Pb1–O1     | 2.304(5) | Pb1–N1      | 2.53(3) |
| Pb1–N4A    | 2.65(2)  |             |         |
| O1–Pb1–N1  | 88.6(5)  | O1–Pb1–N4A  | 80.3(4) |
| N1–Pb1–N4A | 161.3(6) | O1–Pb1–O1B  | 77.0(3) |
| N1–Pb1–O1B | 82.9(4)  | N4A–Pb1–O1B | 80.0(5) |

---

Symmetry code: A =  $x, y, z + 1$ ; B =  $-x + 3/2, y + 1/2, -z + 1/2$  for **6**; A =  $x - 1, y, z$ ; B =  $x, y - 1, z + 1$  for **7**; A =  $x + 1, -y + 2, z - 1/2$ ; B =  $-x + 2, y, -z + 3/2$  for **8**.

**Table S2** Important hydrogen-bonding geometries (Å, °)

| D–H...A     | $d_{D...A}$ | $d_{H...A}$ | $\angle_{D-H...A}$ | Symmetry code               |
|-------------|-------------|-------------|--------------------|-----------------------------|
| <b>1</b>    |             |             |                    |                             |
| O4–H4...N4  | 2.643(5)    | 1.85        | 161                | $-x + 2, y + 3/2, -z + 3/2$ |
| <b>2</b>    |             |             |                    |                             |
| O4–H4A...O3 | 2.692(3)    | 1.86        | 165                | $-x, -y + 1, -z$            |
| O4–H4B...O5 | 2.702(4)    | 1.86        | 170                | $x, y, z - 1$               |
| O5–H5A...N3 | 2.789(5)    | 2.01        | 158                | $x - 1, y, z$               |
| <b>3</b>    |             |             |                    |                             |
| O4–H4A...O5 | 2.741(4)    | 1.89        | 174                | $x - 1, y, z$               |
| O4–H4B...O3 | 2.646(3)    | 1.84        | 158                |                             |
| O5–H5A...N2 | 2.954(4)    | 2.11        | 173                | $-x + 1, -y + 1, -z + 1$    |
| <b>4</b>    |             |             |                    |                             |
| O7–H7A...N7 | 2.763(9)    | 1.92        | 173                | $-x + 2, -y + 1, -z + 1$    |
| O7–H7B...O6 | 2.672(7)    | 1.86        | 160                | $-x + 1, -y + 2, -z + 1$    |
| <b>5</b>    |             |             |                    |                             |
| O7–H7A...N7 | 2.755(6)    | 1.90        | 172                | $-x + 2, -y + 1, -z + 1$    |
| O7–H7B...O6 | 2.665(4)    | 1.86        | 160                | $-x + 1, -y + 2, -z + 1$    |
| <b>6</b>    |             |             |                    |                             |
| O6–H6A...O3 | 2.674(3)    | 1.98        | 138                |                             |
| O6–H6B...O7 | 2.704(5)    | 1.90        | 157                |                             |
| O7–H7...O4  | 2.693(5)    | 1.88        | 171                | $x - 1, y, z + 1$           |

7

|             |           |      |     |                          |
|-------------|-----------|------|-----|--------------------------|
| O6–H6A···O7 | 2.571(12) | 2.15 | 111 | $-x + 1, -y + 1, -z + 1$ |
| O6–H6B···O5 | 2.585(7)  | 1.92 | 134 | $x - 1, y, z$            |
| O6–H6B···O1 | 3.217(8)  | 2.59 | 132 | $-x + 1, -y + 1, -z$     |

---
